# Supplementary material for: A screen for modifiers of RacGAP(84C) gain-of-function in theDrosophilaeye revealed the LIM kinase Cdi/TESK1 as a downstream effector of Rac1 during spermatogenesis
Source: Oxford University Press journal article supplement (doi:10.1242/jcs.01123), 2004-05-28
Supplement: jcs01123tables1.pdf [file jcs01123tables1.pdf]

**Table S1. Insertion position and loss- or gain-of-function analysis of targeted genes**

| Gene                                                    | EP line                 | Position into targeted gene                                                                           | Loss-or gain-of function analysis towards GG17                                                                                       |
|---------------------------------------------------------|-------------------------|-------------------------------------------------------------------------------------------------------|--------------------------------------------------------------------------------------------------------------------------------------|
| <b>A. Ras, Rac and Rho signalling proteins</b>          |                         |                                                                                                       |                                                                                                                                      |
| <i>MESR4</i>                                            | EP(2)386                | -575 bp from mRNA start                                                                               | Behaves like UAS-MESR4 (Huang and Rubin, 2000).                                                                                      |
| <i>AKAP200</i>                                          | EP(2)2072               | -43 bp from mRNA start                                                                                | Behaves like UAS-MESR2 (Huang and Rubin, 2000).                                                                                      |
| <i>MESR2</i>                                            | EP(2)2254               | -114 bp from mRNA start                                                                               |                                                                                                                                      |
| <i>DC3G</i>                                             | EP(1)1613*              | In first intron, -475 bp from AUG start codon                                                         | UAS-DC3G lines (Ishimaru, 1999) similarly enhanced GG17 (see text).                                                                  |
| <i>CG31012</i>                                          | EP(3)3700               | -14 bp from mRNA start                                                                                | <i>P{SUP-or-P}CG31012P<sup>[KG05741]</sup></i> has no effect                                                                         |
| <i>pbl</i>                                              | EP(3)3415*              | 5'UTR, -457bp from AUG start codon                                                                    | Described as gof in (Prokopenko et al., 1999).<br><i>pbl<sup>5</sup></i> has no effect (see text).                                   |
| <i>GEF(64C)</i>                                         | EP(3)3035<br>EP(3)3322* | In first untranslated exon (+26bp)<br>-469 from mRNA start                                            | UAS-GEF (64C) line (Bashaw, 2001) enhanced GG17.<br><i>GEF</i> mutants have no effect (see text).                                    |
| <i>grp</i>                                              | EP(2)587                | In first intron of transcript CG17161-RA,<br>- 16 kb from AUG start codon                             | Described as gof (Abdelilah-Seyfried et al., 2000).<br><i>grp<sup>[06034]</sup></i> has no effect.                                   |
| <i>CG7097</i>                                           | EP(2)2445               | -44 bp from mRNA start                                                                                | <i>Df(2R)P34</i> (55E-56C) has no effect.                                                                                            |
| <i>SNF4Aγ</i>                                           | EP(3)648                | -40 bp from mRNA start of <i>SNF4Aγ</i> transcript<br>CG17299-RH                                      | <i>P{SUPor-P}SNF4Aγ<sup>[KG00325]</sup></i> has no effect.                                                                           |
| <b>B. Cytoskeletal control and membrane trafficking</b> |                         |                                                                                                       |                                                                                                                                      |
| <i>Myo31DF</i>                                          | EP(2)2491               | -28 bp from mRNA start                                                                                | <i>P{lacZ}l(2)k09116</i> has no effect                                                                                               |
| <i>Beach1</i>                                           | EP(2)2299*              | In first intron, + 194 bp downstream of AUG<br>start codon; may generate a Nter truncated<br>protein. | Described as gof in (Abdelilah-et al, 2000; Kraut et al., 2001).<br><i>Df(2L)c17</i> (25E-26A) has no effect.                        |
| <b>C. Chromatin remodelling factors</b>                 |                         |                                                                                                       |                                                                                                                                      |
| <i>kis</i>                                              | EP(2)474                | In first intron of <i>kis</i> CG3696-RA transcript,<br>- 5 kb from CTG start codon                    | Described as gof in (Kraut et al., 2001; Pena-Rangel et al., 2002).<br><i>kis<sup>l</sup></i> has no effect.                         |
|                                                         | EP(2)563                | - 1kb from start of <i>kis</i> CG3696-RB transcript                                                   |                                                                                                                                      |
| <i>dom</i>                                              | EP(2)2371               | -23 bp from mRNA start                                                                                | <i>dom<sup>[K08108]</sup></i> has no effect.                                                                                         |
| <i>Dp1</i>                                              | EP(2)2422               | In first intron, -1152 kb from AUG start codon                                                        | <i>P{GTI}Dp1<sup>[BG01405b]</sup></i> and <i>P{GTI}Dp1<sup>[BG02288]</sup></i> have no effect.                                       |
| <b>D. Spermatogenesis</b>                               |                         |                                                                                                       |                                                                                                                                      |
| <i>poe</i>                                              | EP(2)349<br>EP(2)737    | -18 bp from mRNA start<br>-18 bp from mRNA start                                                      | EP737 described as gof in (Kraut et al., 2001).<br><i>poe<sup>[03420]</sup></i> has no effect.                                       |
| <i>TMS1d</i>                                            | EP(3)807                | -24 bp from mRNA start                                                                                | <i>Df(3L)st-e4</i> (72D-73A) enhanced GG17 (see text).                                                                               |
| <i>cdi</i>                                              | EP(3)3319               | In first non coding exon                                                                              | Described as gof in (Kraut et al., 2001)<br><i>cdi<sup>47</sup></i> has no effect.                                                   |
| <b>E. Others</b>                                        |                         |                                                                                                       |                                                                                                                                      |
| <i>Traf2</i>                                            | EP(1)325                | - 257 bp from mRNA start                                                                              | <i>Df(1)GE202</i> (7D12-7E3) has no effect                                                                                           |
| <i>wun2</i>                                             | EP(2)652                | -4,6kb from mRNA start<br>may affect <i>wun</i> UAS+/-                                                | May affect <i>wunen</i> .<br><i>wun<sup>EMS4</sup></i> and <i>P{lacW}wun<sup>K10201</sup></i> have no effect.                        |
| CG14959                                                 | EP(2)714<br>EP(2)3139   | Both EPs inserted -7,6 kb from mRNA start                                                             | Described as gof (Tseng and Hariharan, 2002; Pena-Rangel et al., 2002).<br><i>P{SUP-or-P}KG0365</i> has no effect                    |
| CG5261                                                  | EP(2)816                | -3kb from mRNA start                                                                                  | Described as gof (Abdelilah-Seyfried et al., 2000;<br>Pena-Rangel et al., 2002).                                                     |
|                                                         |                         | May affect <i>chameau</i> ( <i>chm</i> ) (3' to <i>chm</i> )                                          | <i>P{GTI}chm<sup>[BG02254]</sup></i> has no effect                                                                                   |
| CG3624                                                  | EP(2)827                | - 40 bp from mRNA start                                                                               | <i>P{SUPor-P}CG3624<sup>[KG05061]</sup></i> has no effect                                                                            |
| <i>rho-6</i>                                            | EP(2)2023               | -958 bp from mRNA start                                                                               | <i>P{SUPor-P}rho-6<sup>[KG09603]</sup></i> has no effect                                                                             |
| CG6701                                                  | EP(2)2054               | 5'UTR, -251 bp from AUG                                                                               | Described as gof (Tseng and Hariharan, 2002; Pena-Rangel et al., 2002).<br><i>P{SUPor-P}CG6701<sup>[KG00917]</sup></i> has no effect |
| CG8740                                                  | EP(2)2233               | -36 pb from mRNA (GH05582) start                                                                      | /                                                                                                                                    |
| <i>numb</i>                                             | EP(2)2455               | - 520 bp from <i>numb</i> transcript CG3779-RA                                                        | <i>numb<sup>l</sup></i> has no effect                                                                                                |
| <i>cpo</i>                                              | EP(3)3395<br>EP(3)3608  | Both in second intron of <i>cpo</i> transcript,<br>-2,2 kb from CUC start codon                       | <i>cpo<sup>01432</sup></i> has no effect                                                                                             |
| CG2017                                                  | EP(3)3503               | 5' UTR, - 40 bp from AUG start codon                                                                  | Described as gof (Kraut et al 2001).<br><i>Df(3R)Tpl10,DpDfd[rv1]</i> has no effect                                                  |

Note that Gal4-dependent regulation can be functional at considerable distance of up to 10 kb (Nicolai et al., 2003).

#### References

- Nicolai, M., Lasbleiz, C. and Dura, J. M. (2003). Gain-of-function screen identifies a role of the Src64 oncogene in Drosophila mushroom body development. *J. Neurobiol.* 57, 291-302.
- Pena-Rangel, M. T., Rodriguez, I. and Riesgo-Escovar, J. R. (2002). A misexpression study examining dorsal thorax formation in Drosophila melanogaster. *Genetics* 160, 1035-1050.
- Tseng, A. S. and Hariharan, I. K. (2002). An overexpression screen in Drosophila for genes that restrict growth or cell-cycle progression in the developing eye. *Genetics* 162, 229-243.
